# Supplementary material for: Time Trends and Treatment Pathways in Prescribing Individual Oral Anticoagulants in Patients with Nonvalvular Atrial Fibrillation: An Observational Study of More than Three Million Patients from Europe and the United States
Source: Hindawi journal article supplement (doi:10.1155/2022/6707985), 2022-01-01
Supplement: f1 [file 6707985.f1.pdf]

**Supplementary Table 1.** Codes to identify AF.

| <b>Target diagnosis (SNOMED)</b> | <b>Included SNOMED codes and descriptions</b>                                                                                                                                                                                                                                                                                                                     |
|----------------------------------|-------------------------------------------------------------------------------------------------------------------------------------------------------------------------------------------------------------------------------------------------------------------------------------------------------------------------------------------------------------------|
| Atrial fibrillation              | 49436004, 195080001, 233910005, 233911009, 282825002, 300996004, 314208002, 426749004, 440028005, 440059007, 706923002, 715395008, 120041000119109<br><br>AF and flutter, Controlled AF, Lone AF, Non-rheumatic AF, Chronic AF, Paroxysmal AF, Rapid AF, Permanent AF, Persistent AF, Familial AF, AF with rapid ventricular response, Longstanding persistent AF |

AF, atrial fibrillation

**Supplementary Table 2.** Codes for Antithrombotic agents used for stroke prevention in patients with AF.

| <b>Classification</b>       | <b>ATC code (4<sup>th</sup> class)</b> | <b>ATC code (5<sup>th</sup> class)</b>                                                                                                    |
|-----------------------------|----------------------------------------|-------------------------------------------------------------------------------------------------------------------------------------------|
| vitamin K antagonist        | B01AA                                  | dicoumarol, phenindione, warfarin, phenprocoumon, acenocoumarol, ethyl biscoumacetate, clorindione, diphenadione, tiocloamarol, fluidione |
| Direct thrombin inhibitors  | B01AE                                  | dabigatran etexilate                                                                                                                      |
| Direct factor Xa inhibitors | B01AF                                  | rivaroxaban, apixaban, edoxaban                                                                                                           |

AF, atrial fibrillation; ATC, Anatomical Therapeutic Chemical

**Supplementary Table 3.** Proportion of patients who discontinued with OAC therapy by 2017, according to year of the index OAC prescription (2010–2016).

**Note:** this analysis included only patients still available for observation in 2017.

| Database           | Year of index OAC prescription | N       | % discontinued by 2017 |
|--------------------|--------------------------------|---------|------------------------|
| US LRx Dx          | 2010                           | 7       | 28.6                   |
|                    | 2011                           | 248,497 | 37.5                   |
|                    | 2012                           | 260,636 | 40.4                   |
|                    | 2013                           | 374,200 | 39.0                   |
|                    | 2014                           | 372,428 | 41.6                   |
|                    | 2015                           | 412,452 | 38.6                   |
|                    | 2016                           | 470,267 | 28.4                   |
|                    |                                |         |                        |
| US MarketScan CCAE | 2010                           | 3321    | 53.1                   |
|                    | 2011                           | 6450    | 48.6                   |
|                    | 2012                           | 9542    | 52.5                   |
|                    | 2013                           | 12,661  | 49.0                   |
|                    | 2014                           | 15,328  | 46.4                   |
|                    | 2015                           | 18,848  | 42.1                   |
|                    | 2016                           | 24,793  | 29.7                   |
|                    |                                |         |                        |
| US MarketScan MDCR | 2010                           | 2110    | 33.0                   |
|                    | 2011                           | 4359    | 27.7                   |
|                    | 2012                           | 6526    | 31.2                   |
|                    | 2013                           | 8581    | 28.2                   |
|                    | 2014                           | 9998    | 26.1                   |
|                    | 2015                           | 11,652  | 24.6                   |
|                    | 2016                           | 14,775  | 16.3                   |
|                    |                                |         |                        |
| US PMTX            | 2010                           | 3046    | 54.2                   |
|                    | 2011                           | 4989    | 46.2                   |
|                    | 2012                           | 5544    | 49.4                   |
|                    | 2013                           | 7888    | 46.9                   |
|                    | 2014                           | 10,655  | 42.2                   |
|                    | 2015                           | 17,398  | 35.1                   |
|                    | 2016                           | 20,572  | 26.9                   |
|                    |                                |         |                        |
| UK CPRD            | 2010                           | 1236    | 16.2                   |
|                    | 2011                           | 1501    | 13.1                   |
|                    | 2012                           | 2094    | 12.0                   |
|                    | 2013                           | 2538    | 9.7                    |
|                    | 2014                           | 3431    | 9.0                    |
|                    | 2015                           | 4426    | 7.4                    |
|                    | 2016                           | 4931    | 5.8                    |
|                    |                                |         |                        |

| Database    | Year of index OAC prescription | N    | % discontinued by 2017 |
|-------------|--------------------------------|------|------------------------|
| UK THIN     | 2010                           | 1402 | 15.5                   |
|             | 2011                           | 1752 | 13.4                   |
|             | 2012                           | 2516 | 12.6                   |
|             | 2013                           | 3180 | 10.0                   |
|             | 2014                           | 4191 | 9.5                    |
|             | 2015                           | 5368 | 7.7                    |
|             | 2016                           | 6021 | 5.6                    |
|             |                                |      |                        |
| Germany DA  | 2010                           | 1730 | 25.6                   |
|             | 2011                           | 2987 | 20.8                   |
|             | 2012                           | 4722 | 22.4                   |
|             | 2013                           | 6342 | 22.2                   |
|             | 2014                           | 7480 | 22.0                   |
|             | 2015                           | 8530 | 20.6                   |
|             | 2016                           | 9989 | 18.7                   |
|             |                                |      |                        |
| Belgium LPD | 2010                           | 198  | 42.9                   |
|             | 2011                           | 293  | 37.2                   |
|             | 2012                           | 428  | 29.7                   |
|             | 2013                           | 585  | 32.0                   |
|             | 2014                           | 581  | 29.9                   |
|             | 2015                           | 694  | 32.4                   |
|             | 2016                           | 813  | 25.8                   |
|             |                                |      |                        |
| France DA   | 2010                           | 23   | 21.7                   |
|             | 2011                           | 39   | 33.3                   |
|             | 2012                           | 255  | 31.4                   |
|             | 2013                           | 390  | 28.7                   |
|             | 2014                           | 377  | 23.1                   |
|             | 2015                           | 607  | 20.6                   |
|             | 2016                           | 888  | 16.4                   |
|             |                                |      |                        |

CCAE, Commercial Claims and Encounters; CPRD, Clinical Practice Research Datalink; DA, Disease Analyzer; LPD, Longitudinal Patient Database; LRxDx, Longitudinal Prescription Diagnosis database; MDCR, Medicare Supplemental and Coordination of Benefits; OAC, oral anticoagulant; PMTX, Pharmetrics; THIN, The Health Improvement Network; US, United States; UK, United Kingdom
